# Supplementary material
Source: publisher figshare collection journal article supplement (https://sage.figshare.com/ndownloader/files/15543227)
Supplement: Supplementary file 1 [file 15543227]

Online Appendix Coding Table: Citizen Proposals Coding Sample

| Original Suggestion | Category | Constitutional Subject | Inclusion in Constitution |
| --- | --- | --- | --- |
| “You should write on human rights as a universal right.” | Universal Reference to Human Rights | General Principles | YES |
| “Adding ‘*according to the universal human rights’* after ‘*based on supreme human values*’ in the preamble.” | Universal Reference to Human Rights | General Principles | YES |
| “Change the phrase ‘*with respect to Islam*’ in the preamble to ‘*with respect to Islam and universal human rights*’.” | Universal Reference to Human Rights | General Principles | YES |
| “Change ‘*We the Representatives*’ to ‘*We the People.*’” | We the People | General Principles | NO |
| “Ownership should return to the Tunisian people, and the Constitution should start with “*We the People*.” | We the People | General Principles | NO |
| “Writing on the civility of the state” | Civilian State | General Principles | YES |
| “Constitution should guarantee that military officers cannot become president.” | Civilian State | General Principles | YES |
| “Emphasizing that only civilians can become head of the state.” | Civilian State | General Principles | YES |
| “Add: No one has the right to accuse others of *Takfeer*.” | Prohibition of *Takfeer* | Rights & Liberties | YES |
| “Adding an Article on the criminalization of *Takfeer*.” | Prohibition of *Takfeer* | Rights & Liberties | YES |
| “Writing on abolition of capital punishment.” | Abolition of Capital Punishment | Rights & Liberties | NO |
| “Suggested provision: The right to life is sacred and cannot be prejudiced.” | Abolition of Capital Punishment | Rights & Liberties | NO |
| “It is necessary to first write on the right to housing before the Article on the right to choose place of residency.” | Right to Shelter | Rights & Liberties | NO |
| “Every citizen should have the right to decent shelter.” | Right to Shelter | Rights & Liberties | NO |
| “In Article 67, drop ‘Islam’ as a condition for presidency.” | Religion of HOS | Executive & Legislative | NO |
| “Any Tunisian should be able to become President event non-Muslims.” | Religion of HOS | Executive & Legislative | NO |
| “Provisions on national defense should have their own chapter.” | Order of Articles-Military Provisions | Executive & Legislative | YES |
| “For the sake of separation of powers, Articles on the military should not be in the Chapter of Government.” | Order of Articles-Military Provisions | Executive & Legislative | YES |
| “75 years as the age of candidacy for Presidency? Make it less!” | Decreasing Maximum Age for HOS Candidate | Executive & Legislative | NO |
| “Reducing the maximum age of eligibility for running for president to 60 or 65 years.” | Decreasing Maximum Age for HOS Candidate | Executive & Legislative | NO |
| “Discussing the Supreme Judicial Council’s budget in the Representatives Assembly is interference with the work of the judicial authorities.” | SJC Financial Independence | Judicial, Administrative, Financial, and Constitutional Justice | NO |
| “It is necessary that the Representatives Assembly approves the Supreme Judicial Council’s budget to guarantee its independence.” | SJC Financial Independence | Judicial, Administrative, Financial, and Constitutional Justice | NO |
| “There is no guarantee regarding the immunity of the judges.” | Judges’ Immunity | Judicial, Administrative, Financial, and Constitutional Justice | YES |
| “It is important that Article 103 weighs in on the issue of immunity because immunity is one of the necessary conditions for the independence and neutrality [of the judiciary] which is mentioned in this Article.” | Judges’ Immunity | Judicial, Administrative, Financial, and Constitutional Justice | YES |
| “Delete the whole second part of Article 105 [which establishes the Military Court].” | Prohibition of Prosecuting Citizens in Military Court | Judicial, Administrative, Financial, and Constitutional Justice | NO |
| “Write that the Military Court is not for prosecuting civilians.” | Prohibition of Prosecuting Citizens in Military Court | Judicial, Administrative, Financial, and Constitutional Justice | NO |
| “Establishing a Supreme Council for Muslim Clerics which is responsible for managing mosques, *Ifta’* [i.e. issuing jurisprudential opinions] and protecting the religion of state.” | Constitutionalizing the Supreme Islamic Council | Constitutional Bodies | NO |
| “Add an Article which establishes the Supreme Islamic Council.” | Constitutionalizing the Supreme Islamic Council | Constitutional Bodies | NO |
| “The name of ‘the Electoral Commission’ should change to ‘the Independent Electoral Commission.’” | Independence of Electoral Commission | Constitutional Bodies | YES |
| “Writing on the independence of the election commission [in Article 127].” | Independence of Electoral Commission | Constitutional Bodies | YES |
| “Establishing the Supreme Council for Tunisians Living Abroad to advise the government about the issues regarding our citizens living abroad.” | Establishing a Council for Tunisian Diaspora | Constitutional Bodies | NO |
| “Creating a council for Tunisians abroad.” | Establishing a Council for Tunisian Diaspora | Constitutional Bodies | NO |
| “Cancel the position of mayors and governors and authorize elections for local and regional councils.” | Cancelling the Function of Mayor | Public, Regional, and Local Institutions | NO |
| “Cancelling the function of mayor.” | Cancelling the Function of Mayor | Public, Regional, and Local Institutions | NO |
| “Specify the structure of the Supreme Council of Local Authorities (membership, eligibility, …).” | Specifying the Supreme Council of Local Authorities | Public, Regional, and Local Institutions | YES |
| “Add: The Supreme Council of Local Authorities is composed of members from local and regional councils.” | Specifying the Supreme Council of Local Authorities | Public, Regional, and Local Institutions | YES |
